# Supplementary material for: TYMS 3′-UTR Polymorphism: A Novel Association with FOLFIRINOX-Induced Neurotoxicity in Pancreatic Cancer Patients
Source: MDPI journal article supplement (doi:10.3390/pharmaceutics14010077), 2021-12-29
Supplement: s1 [file s1]

# Supplementary Materials: TYMS 3'-UTR Polymorphism: A Novel Association with FOLFIRINOX-Induced Neurotoxicity in Pancreatic Cancer Patients

Marina Emelyanova, Ilya Pokataev, Igor Shashkov, Elena Kopantseva, Vladimir Lyadov, Rustam Heydarov and Vladimir Mikhailovich

**Table S1.** Multiplex PCR primers used to prepare DNA samples for microarray genotyping.

| Primer               | Sequence 5' → 3'                                        |
|----------------------|---------------------------------------------------------|
| DPYD rs2297595_for*  | CTCTGCGAGCATAATGTACTTGCAGGCCAGCACCAAAAAGAGCAAT          |
| DPYD rs2297595_rev   | GGCTGTACGCTGTCAGGAGGCATGACTCTAGAAAGGAAAGACTGAAAGTTAGCCA |
| DPYD rs3918290_for   | CTCTGCGAGCATAATGTGGCCCTGGACAAAGCTCCTTTCTGAATA           |
| DPYD rs3918290_rev   | GGCTGTACGCTGTCTTCTATGCATCAGCAAAGCAACTGGCAGA             |
| DPYD rs55886062_for  | CTCTGCGAGCATAATGGTTTTGGTGAGGGCAAACCCCATCC               |
| DPYD rs55886062_rev  | GGCTGTACGCTGTCGAGCTTCCGTTTCTGCCAAGCCTG                  |
| DPYD rs67376798_for  | CTCTGCGAGCATAATGAATTCCAGCAGGATTCTTACCTGGTAGCCAGAATCAT   |
| DPYD rs67376798_rev  | GGCTGTACGCTGTCAGCACTGCAGTACCTTGGAACATTTGGTGAATTGAGC     |
| DPYD rs75017182_for  | CTCTGCGAGCATAATGGGAGCATGTCTTTATGAGGGACAAC               |
| DPYD rs75017182_rev  | GGCTGTACGCTGTCTTTCACTCAGCATCAGCCACATATC                 |
| ERCC1 rs11615_for    | CTCTGCGAGCATAATGAGGGCCCTGTGGTTATCAAGGGTCATCCCTATT       |
| ERCC1 rs11615_rev    | GGCTGTACGCTGTCTGCTCTGGCCCAGCACATAGTCGGGAA               |
| ERCC1 rs3212986_for  | CTCTGCGACCATAATGGGCACCTTCAGCTTTCTTTAGTTCCTCAGT          |
| ERCC1 rs3212986_rev  | GGCTGTACGCTGTCAGGAGATGCCAGGGCCGCCACT                    |
| GSTP1 rs1695_for     | CTCTGCGAGCATAATGAGGGCTCTATGGGAAGGACCAGCAGGA             |
| GSTP1 rs1695_rev     | GGCTGTACGCTGTCTGCTGCCCAACCCTGGTGCAGATGCTCA              |
| MTHFR rs1801133_for  | CTCTGCGAGCATAATGCGAAGCAGGGAGCTTTGAGGCTGACCTGAAG         |
| MTHFR rs1801133_rev  | GGCTGTACGCTGTCTCGGTGCATGCCTTCACAAAGCGGAAGAA             |
| TYMS rs11280056_for  | CTCTGCGAGCATAATGCTGAGGGAGCTGAGTAACACCATCG               |
| TYMS rs11280056_rev  | GGCTGTACGCTGTCTGGAAGGAAGTGAAGCAGATAAGTGGC               |
| UGT1A1 rs3064744_for | CTCTGCGAGCATAATGCTCTGAAAGTGAAGTCCCTGCTACCTTTGT          |
| UGT1A1 rs3064744_rev | GGCTGTACGCTGTCTTTGCTCCTGCCAGAGGTTT                      |
| XPC rs2228001_for    | CTCTGCGAGCATAATGAAAGCAGAAGCTGAAGGGTGGGCCCAAGAA          |
| XPC rs2228001_rev    | GGCTGTACGCTGTCCGCCTCCGTGCATGCTGCCTCAGTTT                |
| Adapter_for          | CTCTGCGAGCATAATG                                        |
| Adapter_rev          | GGCTGTACGCTGTC                                          |

\* for and rev, forward and reverse primers, respectively.

**Table S2.** Sequences of oligonucleotide probes immobilized on the microarray.

| Oligonucleotide Probe   | Sequence 5' → 3'            |
|-------------------------|-----------------------------|
| DPYD rs2297595 C        | TGTGGGATACTCACTGCTTTGAATAC* |
| DPYD rs2297595 T        | CTGTGGGATACTCATTGCTTTGAATAC |
| DPYD rs3918290 A        | TTCCAGACAACATAAGTGTGAT      |
| DPYD rs3918290 G        | CCAGACAACGTAAGTGTGA         |
| DPYD rs55886062 C       | AGCTCTTCGACTCATTGATGTG      |
| DPYD rs55886062 A       | AGCTCTTCGAATCATTGATGTGC     |
| DPYD rs67376798 A       | CATTTCTTCAACAATCATAGCC      |
| DPYD rs67376798 T       | CATTTCTTCATCAATCATAGCC      |
| DPYD rs75017182 G       | TTCTCAGCTTTGATTTTCAC        |
| DPYD rs75017182 C       | AATTCTCACCTTTGATTTTCAC      |
| ERCC1 rs11615 C         | GTGCGCAACGTGCCCT            |
| ERCC1 rs11615 T         | GTGCGCAATGTGCCCTG           |
| ERCC1 rs3212986 G       | CTGCTGCTGCTTCCGCTTCTT       |
| ERCC1 rs3212986 T       | GCTGCTGCTTCTTCCGCTTCTT      |
| GSTP1 rs1695 A          | CTGCAAATACATCTCCCTCAT       |
| GSTP1 rs1695 G          | TGCAAATACGTCTCCCTCA         |
| MTHFR rs1801133 T       | TGCGGGAGTCGATTTCA           |
| MTHFR rs1801133 C       | TGCGGGAGCCGATTTTCAT         |
| TYMS rs11280056 Del     | GTGGTTATGAACTTTATAGTTGTTT   |
| TYMS rs11280056 Non-Del | GTGGTTATGAACTTTAAAGTTATAG   |
| UGT1A1 rs3064744 T5     | GCCATATATATATATAAG          |
| UGT1A1 rs3064744T6      | GCCATATATATATATATAAG        |
| UGT1A1 rs3064744 T7     | GCCATATATATATATATATAAG      |
| UGT1A1 rs3064744 T8     | GCCATATATATATATATATAAG      |
| XPC rs2228001 A         | TTCCCATTTGAGAAGCTGTGAG      |
| XPC rs2228001 C         | TTCCCATTTGAGCAGCTGTGA       |

\* All hybridization probes contained 3'-Amino-Modifier C6 CPG 500 for copolymerization with microarray hydrogel components. For details, see the text.
